# Supplementary material for: Coenzyme analogs: excellent substitutes (not poor imitations) for electrochemical regeneration
Source: Royal Society of Chemistry journal article supplement (doi:10.1039/c1cc14313a), 2011-01-01
Supplement: c1cc14313a.pdf [file c1cc14313a.pdf]

C1CC14313A - Chemical Communications

## **Electronic Supplementary Information (ESI)**

### **Coenzyme analogs: excellent substitutes (not poor imitations) for electrochemical regeneration**

**Hye Jung Lee,<sup>a</sup> Sahng Ha Lee,<sup>b</sup> Chan Beum Park<sup>\*b</sup> and Keehoon Won<sup>\*a</sup>**

<sup>a</sup> Department of Chemical and Biochemical Engineering, Dongguk University-Seoul, 26 Pil-dong 3-ga, Jung-gu, Seoul 100-715, Republic of Korea. Fax: +82 2 2268 8729; Tel: +82 2 2260 8922; E-mail: [keehoon@dongguk.edu](mailto:keehoon@dongguk.edu)

<sup>b</sup> Department of Materials Science and Engineering, Korea Advanced Institute of Science and Technology, Science Road 335, Yuseong-gu, Daejeon 305-701, Republic of Korea. Fax: +82 42 350 3310; Tel: +82 42 350 3340; E-mail: [parkcb@kaist.ac.kr](mailto:parkcb@kaist.ac.kr)

**Table S1** Absorption maxima ( $\lambda_{\max}$ ), molar extinction coefficients ( $\epsilon$ ), and redox potentials of NAD and its analogs<sup>11</sup>

| <b>NAD and its analogs</b> | <b><math>\lambda_{\max}</math><sup>a</sup> (nm)</b> | <b><math>\epsilon</math> at <math>\lambda_{\max}</math> (mM<sup>-1</sup>cm<sup>-1</sup>)</b> | <b>Redox potential (mV)</b> |
|----------------------------|-----------------------------------------------------|----------------------------------------------------------------------------------------------|-----------------------------|
| NAD                        | 338                                                 | 6.22                                                                                         | -320                        |
| thio-NAD                   | 395                                                 | 11.30                                                                                        | -285                        |
| APAD                       | 363                                                 | 9.10                                                                                         | -258                        |
| PAAD                       | 358                                                 | 9.30                                                                                         | -262                        |
| NAAD                       | 330                                                 | 5.50                                                                                         | NA                          |

<sup>a</sup> The reduced form.
